# Supplementary material for: The effect of the ball to reactant ratio on mechanochemical reaction times studied by in situ PXRD
Source: Royal Society of Chemistry journal article supplement (doi:10.1039/c7ce00502d), 2017-01-01
Supplement: c7ce00502d1.pdf [file c7ce00502d1.pdf]

Supporting Information

# The effect of the ball to reactant ratio on mechanochemical reaction times studied by in situ PXRD

Hannes Kulla,<sup>ab</sup> Franziska Fischer,<sup>a</sup> Sigrid Benemann<sup>a</sup>, Klaus Rademann<sup>b</sup> and Franziska Emmerling<sup>\*a</sup>

<sup>a</sup> BAM Federal Institute for Materials Research and Testing, Richard-Willstaetter-Strasse 11, 12489 Berlin, Germany.  
Fax:030/8104-1139; Tel:030/8104-1133

<sup>b</sup> Department of Chemistry, Humboldt-Universität zu Berlin, Brook-Taylor-Str. 2, 12489 Berlin, Germany.

E-mail\*: [franziska.emmerling@bam.de](mailto:franziska.emmerling@bam.de)

**Table 1.** Weighed portions and the corresponding BRRs for the reaction of theophylline (TP) and benzoic acid (BA) in molar ratio of 1:1 without SiO<sub>2</sub>.

| total mass [mg] | mass of TP[mg] | mass of BA [mg] | ball to reactant ratio (BRR) |
|-----------------|----------------|-----------------|------------------------------|
| 400             | 238            | 162             | 20                           |
| 500             | 298            | 202             | 16                           |
| 600             | 358            | 242             | 13.3                         |
| 700             | 417            | 283             | 11.4                         |
| 800             | 477            | 323             | 10                           |
| 1000            | 596            | 404             | 8                            |

**Table 2.** Weighed portions and the corresponding BRRs for the reaction of theophylline (TP) and benzoic acid (BA) in molar ratio of 1:1 in the presence of SiO<sub>2</sub>.

| total mass [mg] | mass of TP[mg] | mass of BA [mg] | mass of SiO <sub>2</sub> [mg] | ball to reactant ratio (BRR) |
|-----------------|----------------|-----------------|-------------------------------|------------------------------|
| 1000            | 238            | 162             | 600                           | 20                           |
| 1000            | 298            | 202             | 500                           | 16                           |
| 1000            | 358            | 242             | 400                           | 13.3                         |
| 1000            | 417            | 283             | 300                           | 11.4                         |
| 1000            | 477            | 323             | 200                           | 10                           |
| 1000            | 596            | 404             | 0                             | 8                            |

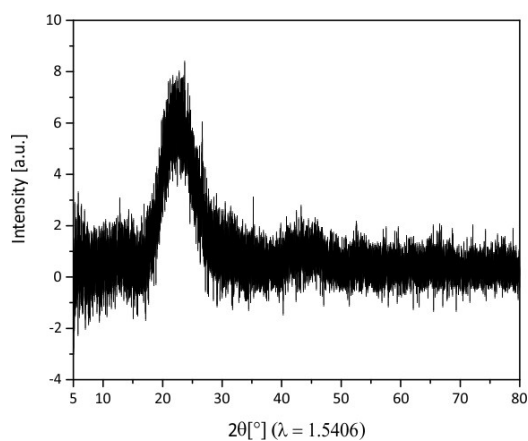

**Figure S1.** X-ray diffraction pattern of SiO<sub>2</sub> hollow glass spheres.

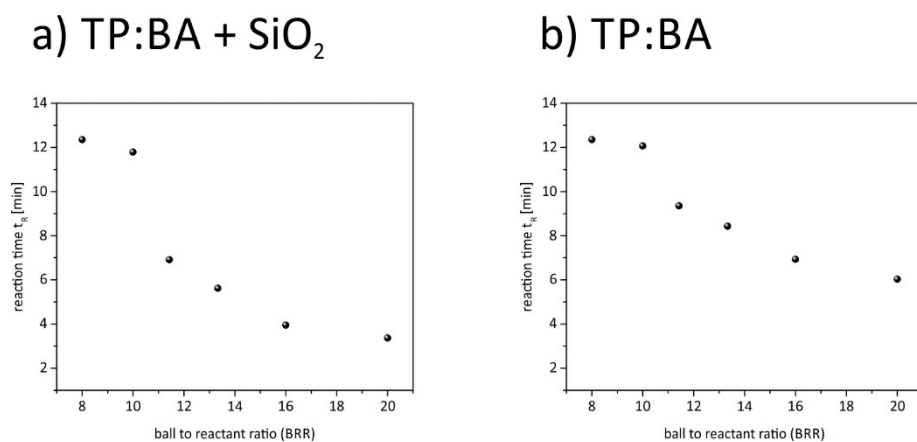

**Figure S2.** Results of the second run. Reaction times for the cocrystal formation of TP:BA (1:1) as a function of the ball to reactant ratio (BRR) under neat grinding conditions. a) TP and BA (1:1) with weight percentages of 40-100 wt% in the presence of SiO<sub>2</sub> to keep the total load at 1g and b) TP and BA (1:1) with total masses of 400-1000 mg without SiO<sub>2</sub>.

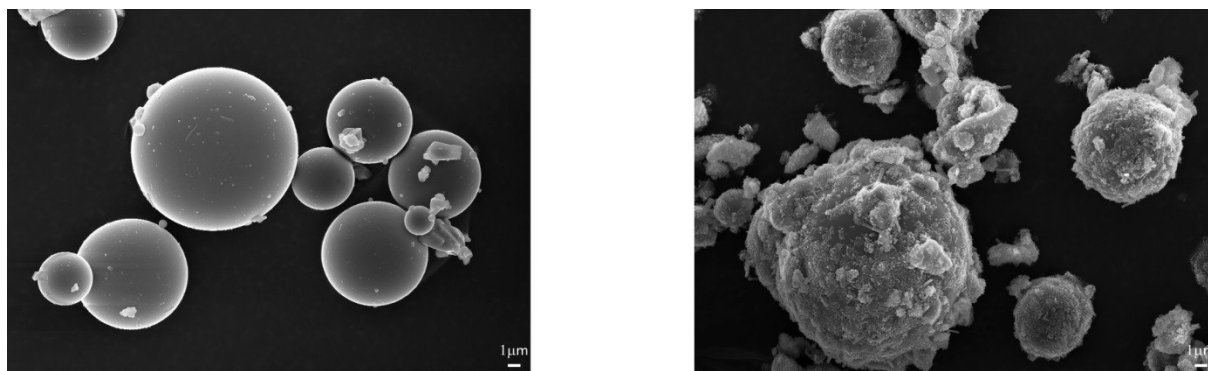

**Figure S3.** SEM images of  $\text{SiO}_2$  hollow spheres before (left) and after (right) grinding for 20 min with theophylline and benzoic acid in molar ratio of 1:1 (40 wt%) to form the TP:BA cocrystal.

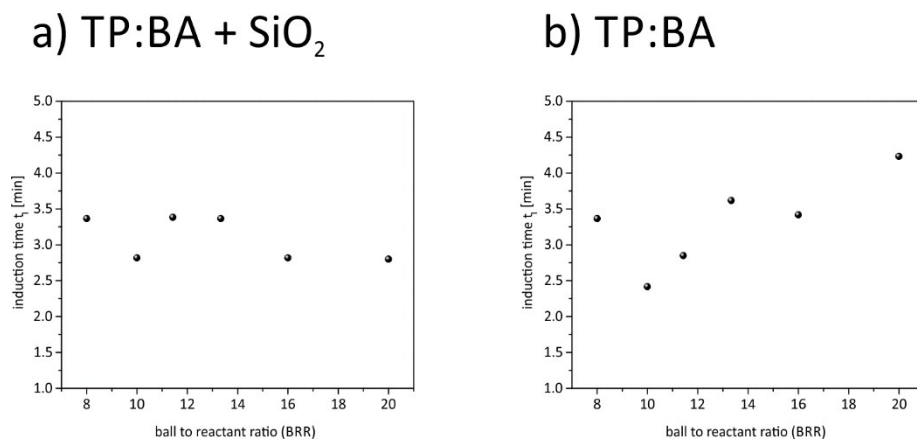

**Figure S4.** Results of the second run. Induction times for the cocrystal formation of TP:BA (1:1) as a function of the ball to reactant ratio (BRR) under neat grinding conditions. a) TP and BA (1:1) with weight percentages of 40-100 wt% in the presence of  $\text{SiO}_2$  and b) TP and BA (1:1) with total masses of 400-1000 mg without  $\text{SiO}_2$ .
